# Supplementary material for: Bad things can happen: are medical students aware of patient centered care and safety?
Source: publisher site journal article supplement (doi:10.1515/dx-2022-0072), 2022-11-09
Supplement: Supplementary file 1 [file j_dx-2022-0072_suppl_001.docx]

**Table 2s: Topics of the online questionnaire**

**Sociometry and demographics**

- Demographics
- Details to the accreditation to study medicine
- Engagements before entering medical school

**Expectations into the studies and the medical profession**

- Decision path to study medicine
- Preferred teaching method
- Appraisal of the medical curriculum: The good and the bad
- Expectations being a medical professional
- Career plans

**Errors in medicine**

- Characteristics of a good doctor
- Preconditions to become a good doctor
- Direct challenges of patient management
- Indirect challenges of patient management
- The exacting patient
- Patient well-being vs monetary compensation
- Working conditions
- Hubris
- Mistake awareness
- Avoidance measures
  - Personal experience
  - Digital solutions
  - Morbidity and mortality conferences
  - Checklists
  - Working in a team
- Error management
